# Supplementary material
Source: PubMed Central journal article supplement (PMC2786310)
Supplement: NIHMS151033-supplement-supplement_1.pdf [file NIHMS151033-supplement-supplement_1.pdf]

**Supplementary Table 1** Polymorphisms in genes in the one-carbon metabolism pathway among 941 Caucasian control subjects, Mayo Clinic, MN and Duke University, NC, 1999-2006

| Gene           | Location     | rsID      | Polymorphic region† | Nucleotide position* | Amino acid change | All N=941 |             | Mayo N=462 |             | Duke N=479 |      |
|----------------|--------------|-----------|---------------------|----------------------|-------------------|-----------|-------------|------------|-------------|------------|------|
|                |              |           |                     |                      |                   | MAF†      | HWE‡        | MAF†       | HWE‡        | MAF†       | HWE‡ |
| <i>AHCYL1</i>  | 1p13.2       | 333079    | 5' UTR              | -1677 A>G            |                   | 0.36      | <b>0.02</b> | 0.34       | 0.05        | 0.37       | 0.18 |
|                |              | 9429768   | IVS1                | 2177 T>C             |                   | 0.31      | <b>0.01</b> | 0.30       | <b>0.01</b> | 0.33       | 0.22 |
|                |              | 3768480   | IVS1                | 3688 G>C             |                   | 0.44      | <b>0.01</b> | 0.45       | <b>0.03</b> | 0.44       | 0.10 |
|                |              | 2298116   | IVS1                | 8896 A>G             |                   | 0.05      | 0.09        | 0.06       | 0.20        | 0.05       | 0.25 |
|                |              | 11588387  | IVS1                | 10557 G>A            |                   | 0.08      | 0.30        | 0.09       | 0.41        | 0.08       | 0.52 |
|                |              | 720917    | IVS1                | 15717 A>G            |                   | 0.18      | 0.72        | 0.19       | 0.52        | 0.17       | 0.23 |
|                |              | 17668350  | IVS1                | 15916 A>G            |                   | 0.08      | 0.23        | 0.07       | 0.73        | 0.08       | 0.05 |
| <i>ALDH1L1</i> | 3q21.2       | 186724    | IVS11               | 33608 C>T            |                   | 0.23      | <b>0.03</b> | 0.22       | <b>0.03</b> | 0.24       | 0.41 |
|                |              | 2276724   | EX12                | 45621 A>G            | Ser481Gly         | 0.16      | 0.80        | 0.16       | 0.80        | 0          | 0    |
|                |              | 1127717   | EX21                | 73971 A>G            | Asp793Gly         | 0.21      | 0.92        | 0.19       | 0.52        | 0.22       | 0.50 |
| <i>DHFR</i>    | 5q11.2-q13.2 | 380691    | 5' UTR              | -1234 A>G            |                   | 0.36      | 0.42        | 0.35       | 0.11        | 0.36       | 0.66 |
|                |              | 10072026  | IVS3                | 5660 T>C             |                   | 0.08      | 0.35        | 0.08       | 0.90        | 0.08       | 0.24 |
|                |              | 1643650   | IVS3                | 10657 A>G            |                   | 0.27      | 0.26        | 0.27       | 0.37        | 0.27       | 0.49 |
|                |              | 11951910  | IVS3                | 11329 A>G            |                   | 0.09      | 0.55        | 0.09       | 0.55        | 0          | 0    |
|                |              | 1677693   | IVS3                | 14482 G>T            |                   | 0.27      | 0.28        | 0.27       | 0.40        | 0.27       | 0.49 |
|                |              | 1650723   | 3' UTR              | 28770 G>A            |                   | 0.17      | 0.35        | 0.16       | 0.40        | 0.18       | 0.62 |
|                |              | 12517451  | 3' UTR              | 30727 G>A            |                   | 0.24      | 0.89        | 0.25       | 0.66        | 0.23       | 0.82 |
| <i>DNMT1</i>   | 19p13.2      | 759920    | IVS6                | 21034 G>A            |                   | 0.49      | 0.41        | 0.50       | 0.85        | 0.47       | 0.17 |
|                |              | 9305012   | IVS23               | 44943 T>C            |                   | 0.06      | 0.65        | 0.06       | 0.17        | 0.07       | 0.57 |
| <i>DNMT3A</i>  | 2p23         | 7560488   | 5' UTR              | -3359 A>G            |                   | 0.42      | 0.77        | 0.41       | 0.37        | 0.44       | 0.61 |
|                |              | 1550117   | 5' UTR              | -445 G>A             |                   | 0.07      | 0.52        | 0.07       | 0.87        | 0.06       | 0.44 |
|                |              | 10196635  | IVS1                | 10944 T>A            |                   | 0.10      | 0.24        | 0.11       | 0.73        | 0.09       | 0.13 |
|                |              | 2384146   | IVS1                | 11371 T>C            |                   | 0.44      | 0.25        | 0.42       | 0.87        | 0.45       | 0.08 |
|                |              | 12987326  | IVS1                | 14467 T>C            |                   | 0.38      | 0.09        | 0.38       | 0.09        | 0.38       | 0.45 |
|                |              | 13036246  | IVS2                | 32493 T>C            |                   | 0.48      | 0.54        | 0.48       | 0.98        | 0.48       | 0.40 |
|                |              | 749131    | IVS2                | 35838 C>A            |                   | 0.44      | <b>0.02</b> | 0.44       | 0.10        | 0.45       | 0.12 |
|                |              | 7587636   | IVS3                | 46600 T>C            |                   | 0.46      | 0.20        | 0.46       | 0.24        | 0.47       | 0.52 |
|                |              | 6739187   | IVS3                | 51810 G>A            |                   | 0.44      | 0.54        | 0.43       | 0.30        | 0.44       | 0.06 |
| 11677670       | IVS3         | 55186 G>A |                     | 0.24                 | 0.16              | 0.20      | 0.97        | 0.27       | 0.05        |            |      |

|               |            |          |        |            |           |      |             |      |             |      |             |
|---------------|------------|----------|--------|------------|-----------|------|-------------|------|-------------|------|-------------|
|               |            | 6733868  | IVS4   | 65595 G>C  |           | 0.46 | 0.54        | 0.46 | 0.73        | 0.47 | 0.60        |
|               |            | 11892646 | IVS6   | 70988 C>T  |           | 0.11 | 0.60        | 0.12 | 0.60        | 0.10 | 0.89        |
|               |            | 13428812 | IVS6   | 72995 A>G  |           | 0.30 | 0.94        | 0.30 | 0.85        | 0.31 | 0.93        |
|               |            | 11683424 | IVS6   | 76330 C>T  |           | 0.19 | 0.70        | 0.20 | 0.89        | 0.17 | 0.44        |
|               |            | 6546045  | IVS6   | 77804 A>G  |           | 0.30 | 0.47        | 0.32 | 0.65        | 0.28 | 0.50        |
|               |            | 12991495 | IVS6   | 78692 T>C  |           | 0.32 | 0.23        | 0.32 | 0.55        | 0.32 | <b>0.02</b> |
|               |            | 11887120 | IVS6   | 79727 G>A  |           | 0.41 | 0.42        | 0.41 | 0.10        | 0.42 | 0.64        |
|               |            | 734693   | IVS17  | 101591 T>C |           | 0.23 | 0.96        | 0.22 | 0.20        | 0.24 | 0.28        |
|               |            | 10084238 | IVS22  | 107083 T>C |           | 0.39 | 0.80        | 0.38 | 0.41        | 0.40 | 0.27        |
|               |            | 11695471 | IVS22  | 107754 A>T |           | 0.34 | 0.71        | 0.35 | 0.18        | 0.33 | 0.06        |
|               |            | 13420827 | 3' UTR | 111494 C>G |           | 0.19 | 0.13        | 0.20 | 0.39        | 0.19 | 0.19        |
| <i>DNMT3B</i> | 20q11.2    | 2424905  | 5' UTR | 2737 A>G   |           | 0.43 | 0.56        | 0.43 | 0.85        | 0.43 | 0.53        |
|               |            | 2424908  | IVS1   | 10193 G>A  |           | 0.21 | 0.34        | 0.21 | 0.34        | 0    | 0           |
|               |            | 6119954  | IVS1   | 13976 G>A  |           | 0.16 | 0.58        | 0.15 | 0.32        | 0.17 | 0.88        |
|               |            | 709046   | IVS20  | 41039 G>A  |           | 0.03 | 1.0         | 0.04 | 1.0         | 0.02 | 1.0         |
|               |            | 4911262  | IVS21  | 43162 G>A  |           | 0.39 | 0.29        | 0.39 | 0.59        | 0.39 | 0.34        |
|               |            | 4911263  | IVS21  | 43613 G>A  |           | 0.32 | 0.44        | 0.33 | 0.52        | 0.32 | 0.65        |
|               |            | 6058896  | 3' UTR | 45962 G>A  |           | 0.06 | 0.76        | 0.07 | 0.53        | 0.05 | 0.74        |
|               |            | 2424932  | 3' UTR | 46346 G>A  |           | 0.41 | 0.80        | 0.43 | 0.29        | 0.40 | 0.46        |
|               |            | 6058897  | 3' UTR | 47915 G>T  |           | 0.50 | 0.28        | 0.49 | 0.31        | 0.50 | 0.61        |
|               |            | 437302   | 3' UTR | 48178 G>A  |           | 0.10 | 0.15        | 0.09 | 0.55        | 0.11 | <b>0.02</b> |
| <i>DPYD</i>   | 1p22       | 1801265  | EX2    | 37731 A>G  | Arg29Cys  | 0.21 | 0.52        | 0.20 | 0.54        | 0.21 | 0.76        |
|               |            | 2297595  | EX6    | 221525 A>G | Met166Val | 0.10 | 0.31        | 0.10 | 0.22        | 0.10 | 0.83        |
|               |            | 1801159  | EX13   | 405221 A>G | Ile543Val | 0.20 | 0.33        | 0.20 | 0.42        | 0.19 | 0.56        |
|               |            | 291592   | EX23   | 842852 C>T |           | 0.45 | 0.40        | 0.44 | 0.99        | 0.45 | 0.24        |
|               |            | 17470762 | 3' UTR | 842984 A>G |           | 0.03 | 1.00        | 0.04 | 1.0         | 0.03 | 0.31        |
| <i>FOLR1</i>  | 11q13      | 3016432  | 5' UTR | -3346 T>C  |           | 0.49 | 0.29        | 0.51 | 0.05        | 0.47 | 0.70        |
|               |            | 2071010  | 5' UTR | 363 G>A    |           | 0.07 | 0.32        | 0.08 | 0.17        | 0.06 | 0.93        |
| <i>MAT2B</i>  | 5q34-q35.1 | 10515861 | IVS1   | 517 A>G    |           | 0.33 | 0.63        | 0.35 | 0.77        | 0.32 | 0.67        |
|               |            | 1363730  | IVS1   | 784 G>A    |           | 0.13 | 0.82        | 0.13 | 0.31        | 0.13 | 0.46        |
|               |            | 17601374 | IVS1   | 3672 A>T   |           | 0.16 | 0.14        | 0.16 | 0.22        | 0.17 | 0.37        |
|               |            | 1472376  | IVS1   | 6234 C>T   |           | 0.18 | <b>0.02</b> | 0.18 | <b>0.02</b> | 0.17 | 0.39        |
|               |            | 4869087  | IVS1   | 6995 T>G   |           | 0.30 | 0.27        | 0.31 | 0.17        | 0.30 | 0.83        |
|               |            | 6874065  | IVS2   | 9304 T>C   |           | 0.46 | 0.87        | 0.46 | 0.91        | 0.47 | 0.72        |
|               |            | 7722729  | IVS4   | 12206 T>C  |           | 0.17 | 0.66        | 0.18 | 0.62        | 0.15 | 0.88        |
|               |            | 7716203  | 3' UTR | 17654 A>G  |           | 0.42 | 0.57        | 0.43 | 0.38        | 0.42 | 0.10        |

|               |          |                |        |            |           |            |      |      |             |      |      |      |      |
|---------------|----------|----------------|--------|------------|-----------|------------|------|------|-------------|------|------|------|------|
| <i>MBD4</i>   | 3q21-q22 | 729352         | IVS4   | 18985 C>T  |           | 0.25       | 0.18 | 0.25 | 0.82        | 0.26 | 0.10 |      |      |
|               |          | 3138326        | 5' UTR | -1176 T>A  |           | 0.10       | 0.68 | 0.09 | 0.27        | 0.11 | 0.68 |      |      |
|               |          | 140695         | IVS5   | 6709 C>T   |           | 0.30       | 0.71 | 0.31 | <b>0.03</b> | 0.29 | 0.09 |      |      |
| <i>MGMT</i>   | 10q26    | 3138360        | IVS7   | 7683 C>T   |           | 0.06       | 0.33 | 0.07 | 0.46        | 0.05 | 0.56 |      |      |
|               |          | 12917          | EX5    | 240764 G>A | Leu84Phe  | 0.12       | 0.09 | 0.12 | <b>0.03</b> | 0.12 | 0.80 |      |      |
|               |          | 2308321        | EX7    | 299545 A>G | Ile143Val | 0.16       | 0.83 | 0.13 | 0.93        | 0.19 | 0.68 |      |      |
| <i>MTHFD1</i> | 14q24    | 2308327        | EX7    | 299651 A>G | Lys178Arg | 0.13       | 0.94 | 0.13 | 0.94        | 0    | 0    |      |      |
|               |          | 1956545        | 5' UTR | -2162 A>G  |           | 0.09       | 0.92 | 0.09 | 0.24        | 0.08 | 0.24 |      |      |
|               |          | 3783731        | IVS1   | 6320 G>A   |           | 0.17       | 0.59 | 0.16 | 0.35        | 0.19 | 0.15 |      |      |
|               |          | 8003379        | IVS2   | 18532 T>G  |           | 0.26       | 0.32 | 0.27 | 0.63        | 0.25 | 0.34 |      |      |
|               |          | 1950902        | EX6    | 27313 G>A  | Arg134Lys | 0.20       | 0.71 | 0.20 | 0.09        | 0.21 | 0.26 |      |      |
|               |          | 17751556       | IVS6   | 29039 A>G  |           | 0.08       | 0.76 | 0.08 | 0.86        | 0.07 | 0.81 |      |      |
|               |          | 2295640        | IVS7   | 31359 G>C  |           | 0.11       | 0.57 | 0.11 | 0.86        | 0.11 | 0.53 |      |      |
|               |          | 17824591       | IVS8   | 32644 C>T  |           | 0.20       | 0.82 | 0.21 | 0.40        | 0.19 | 0.56 |      |      |
|               |          | 3783728        | IVS8   | 33137 A>G  |           | 0.07       | 0.60 | 0.07 | 0.91        | 0.08 | 0.43 |      |      |
|               |          | 17101854       | IVS17  | 51198 C>T  |           | 0.02       | 1.00 | 0.03 | 1.0         | 0.02 | 1.0  |      |      |
|               |          | 8003567        | IVS19  | 53584 T>C  |           | 0.09       | 0.20 | 0.09 | 0.08        | 0.09 | 0.94 |      |      |
|               |          | 2236225        | EX20   | 53778 C>T  | Gln653Arg | 0.43       | 0.15 | 0.43 | 0.93        | 0.44 | 0.06 |      |      |
|               |          | 11629135       | IVS22  | 58044 C>T  |           | 0.09       | 0.19 | 0.08 | 0.06        | 0.09 | 0.94 |      |      |
|               |          | 3818239        | IVS22  | 59470 T>C  |           | 0.11       | 0.86 | 0.10 | 0.15        | 0.12 | 0.28 |      |      |
|               |          | 11849530       | IVS24  | 63345 A>G  |           | 0.26       | 0.14 | 0.27 | 0.51        | 0.25 | 0.15 |      |      |
|               |          | 1256146        | IVS25  | 65598 C>T  |           | 0.19       | 0.95 | 0.20 | 0.62        | 0.18 | 0.56 |      |      |
|               |          | 745686         | 3' UTR | 75565 T>C  |           | 0.35       | 0.05 | 0.36 | 0.34        | 0.35 | 0.08 |      |      |
|               |          | <i>MTHFD1L</i> | 6q25.1 | 7646       | 3' UTR    | 236060 A>G |      | 0.29 | 0.38        | 0.29 | 0.25 | 0.29 | 0.93 |
|               |          |                |        | 1047662    | 3' UTR    | 236145 C>G |      | 0.06 | 0.31        | 0.07 | 0.61 | 0.05 | 0.30 |
|               |          |                |        | 7543       | 3' UTR    | 236246 G>A |      | 0.36 | 0.39        | 0.36 | 0.39 | 0    | 0    |
| <i>MTHFD2</i> | 2p13.1   | 828858         | 5' UTR | 180140 T>A |           | 0.40       | 0.29 | 0.39 | 0.82        | 0.41 | 0.09 |      |      |
|               |          | 1667627        | IVS2   | 187138 T>C |           | 0.47       | 0.37 | 0.48 | 0.79        | 0.45 | 0.30 |      |      |
|               |          | 8001           | 3' UTR | 200353 T>C |           | 0.45       | 0.05 | 0.44 | 0.19        | 0.47 | 0.12 |      |      |
| <i>MTHFR</i>  | 1p36.3   | 10199560       | 3' UTR | 200997 A>G |           | 0.03       | 1.00 | 0.03 | 1.0         | 0.03 | 1.0  |      |      |
|               |          | 3753582        | IVS1   | 574 A>C    |           | 0.11       | 0.90 | 0.11 | 0.41        | 0.11 | 0.52 |      |      |
|               |          | 17367504       | IVS2   | 3338 A>G   |           | 0.16       | 0.84 | 0.16 | 0.83        | 0.16 | 0.94 |      |      |
|               |          | 9651118        | IVS2   | 3902 T>C   |           | 0.23       | 0.29 | 0.23 | 0.23        | 0.23 | 0.77 |      |      |
|               |          | 13306567       | IVS3   | 5651 G>C   |           | 0.05       | 0.35 | 0.05 | 1.0         | 0.05 | 0.24 |      |      |
|               |          | 11121832       | IVS4   | 5996 G>A   |           | 0.25       | 0.87 | 0.25 | 0.64        | 0.25 | 0.81 |      |      |
|               |          | 4846052        | IVS4   | 8165 C>T   |           | 0.41       | 0.33 | 0.42 | 0.79        | 0.41 | 0.27 |      |      |

|              |         |          |        |            |           |      |               |      |              |      |             |
|--------------|---------|----------|--------|------------|-----------|------|---------------|------|--------------|------|-------------|
|              |         | 17421511 | IVS4   | 8328 G>A   |           | 0.17 | 0.75          | 0.17 | 0.70         | 0.17 | 0.94        |
|              |         | 17421462 | IVS4   | 9269 G>A   |           | 0.08 | 0.16          | 0.08 | <b>0.03</b>  | 0.08 | 0.90        |
|              |         | 1801133  | EX5    | 9738 C>T   | Ala222Val | 0.33 | <b>0.03</b>   | 0.33 | 0.14         | 0.33 | 0.10        |
|              |         | 12121543 | IVS7   | 11445 C>A  |           | 0.25 | 0.64          | 0.26 | 0.09         | 0.24 | <b>0.02</b> |
|              |         | 1801131  | EX8    | 11640 A>C  | Glu429Ala | 0.32 | 0.54          | 0.32 | 0.77         | 0.31 | 0.24        |
|              |         | 17375901 | IVS9   | 13600 C>T  |           | 0.06 | 0.21          | 0.06 | 0.18         | 0.06 | 0.68        |
|              |         | 1476413  | IVS10  | 13816 C>T  |           | 0.27 | 0.99          | 0.27 | 0.23         | 0.27 | 0.24        |
|              |         | 4846049  | 3' UTR | 15751 G>T  |           | 0.33 | 0.99          | 0.33 | 0.62         | 0.32 | 0.61        |
|              |         | 2184226  | 3' UTR | 18680 A>G  |           | 0.08 | <b>0.02</b>   | 0.08 | <b>0.005</b> | 0.09 | 0.56        |
|              |         | 4846048  | 3' UTR | 19864 A>G  |           | 0.30 | 0.83          | 0.29 | 0.78         | 0.30 | 0.56        |
| <i>MTHFS</i> | 15q25.1 | 2115537  | 5' UTR | -4802 C>G  |           | 0.20 | <b>0.03</b>   | 0.20 | 0.19         | 0.19 | 0.07        |
|              |         | 2115539  | 5' UTR | -1541 G>C  |           | 0.31 | 0.89          | 0.32 | 0.92         | 0.30 | 0.79        |
|              |         | 2115540  | 5' UTR | -964 G>A   |           | 0.42 | 0.49          | 0.42 | 0.82         | 0.41 | 0.46        |
|              |         | 4573897  | IVS1   | 2119 C>T   |           | 0.50 | 0.18          | 0.50 | 0.71         | 0.50 | 0.13        |
|              |         | 12440798 | IVS1   | 3004 C>T   |           | 0.14 | 0.29          | 0.14 | 0.14         | 0.14 | 0.96        |
|              |         | 2733088  | IVS1   | 4687 C>T   |           | 0.38 | 0.42          | 0.39 | 0.50         | 0.38 | 0.07        |
|              |         | 2586182  | IVS1   | 5578 A>C   |           | 0.11 | 0.39          | 0.09 | 0.24         | 0.12 | <b>0.04</b> |
|              |         | 2733107  | IVS2   | 10732 A>T  |           | 0.13 | 0.93          | 0.14 | 0.26         | 0.12 | 0.28        |
|              |         | 12438477 | IVS2   | 11061 C>A  |           | 0.39 | 0.69          | 0.39 | 0.45         | 0.38 | 0.85        |
|              |         | 2562744  | IVS2   | 14956 A>C  |           | 0.49 | 0.93          | 0.51 | 0.90         | 0.50 | 1.0         |
|              |         | 8026997  | IVS2   | 26322 A>G  |           | 0.37 | 0.36          | 0.37 | 0.52         | 0.37 | 0.50        |
|              |         | 11634787 | IVS2   | 28049 C>T  |           | 0.08 | 0.64          | 0.08 | 0.19         | 0.08 | 0.51        |
|              |         | 6495449  | IVS2   | 31185 G>A  |           | 0.09 | 0.84          | 0.09 | 0.71         | 0.09 | 0.94        |
|              |         | 7177659  | IVS2   | 31302 C>A  |           | 0.45 | 0.78          | 0.44 | 0.12         | 0.46 | 0.06        |
|              |         | 17284990 | IVS2   | 45147 T>C  |           | 0.23 | 0.49          | 0.21 | <b>0.04</b>  | 0.24 | 0.40        |
|              |         | 2054288  | IVS2   | 46269 A>G  |           | 0.18 | 0.06          | 0.19 | 0.24         | 0.17 | 0.14        |
|              |         | 2733103  | IVS2   | 50773 G>A  |           | 0.15 | 0.58          | 0.16 | 0.22         | 0.13 | 0.61        |
|              |         | 8923     | EX3    | 51784 A>G  | Thr202Ala | 0.10 | 0.14          | 0.11 | <b>0.004</b> | 0.10 | 0.39        |
|              |         | 11854561 | 3' UTR | 52572 G>A  |           | 0.29 | 0.46          | 0.29 | 0.74         | 0.28 | 0.48        |
|              |         | 685487   | 3' UTR | 53215 T>C  |           | 0.37 | 0.48          | 0.37 | 0.48         | 0.38 | 0.10        |
| <i>MTR</i>   | 1q43    | 12759827 | IVS4   | 13469 A>G  |           | 0.27 | <b>0.003</b>  | 0.26 | <b>0.02</b>  | 0.28 | 0.09        |
|              |         | 4659723  | IVS4   | 14011 G>A  |           | 0.15 | 0.18          | 0.15 | 0.49         | 0.15 | 0.24        |
|              |         | 4659724  | IVS5   | 15407 C>T  |           | 0.39 | <b>0.0005</b> | 0.41 | <b>0.02</b>  | 0.37 | <b>0.01</b> |
|              |         | 10925250 | IVS18  | 63413 T>C  |           | 0.20 | 0.56          | 0.19 | 0.68         | 0.20 | 0.23        |
|              |         | 1805087  | EX26   | 89783 A>G  | Asp919Gly | 0.19 | 0.45          | 0.19 | 0.94         | 0.20 | 0.26        |
|              |         | 2853523  | 3' UTR | 103481 C>A |           | 0.39 | <b>0.0001</b> | 0.38 | <b>0.003</b> | 0.41 | 0.09        |

|                |              |          |        |            |           |      |              |      |              |      |             |
|----------------|--------------|----------|--------|------------|-----------|------|--------------|------|--------------|------|-------------|
|                |              | 1050993  | 3' UTR | 103588 C>T |           | 0.39 | <b>0.001</b> | 0.38 | <b>0.003</b> | 0.41 | 0.08        |
|                |              | 6676866  | 3' UTR | 105909 G>T |           | 0.41 | <b>0.002</b> | 0.40 | <b>0.003</b> | 0.42 | 0.17        |
| <i>MTRR</i>    | 5p15.3-p15.2 | 16879258 | 5' UTR | -3325 C>A  |           | 0.13 | 0.57         | 0.12 | 0.81         | 0.14 | 0.56        |
|                |              | 17184211 | 5' UTR | -3110 T>A  |           | 0.21 | 0.35         | 0.20 | 0.41         | 0.22 | 0.62        |
|                |              | 1801394  | EX2    | 1757 G>A   | Met22Ile  | 0.45 | 0.24         | 0.46 | 0.27         | 0.43 | 0.59        |
|                |              | 7730643  | IVS    | 6747 T>C   |           | 0.17 | 0.49         | 0.18 | 0.33         | 0.15 | <b>0.04</b> |
|                |              | 326121   | IVS4   | 7072 A>G   |           | 0.27 | 0.61         | 0.28 | 0.43         | 0.25 | 0.99        |
|                |              | 326123   | IVS4   | 7645 A>G   |           | 0.40 | 0.05         | 0.41 | <b>0.02</b>  | 0.40 | 0.63        |
|                |              | 326124   | IVS4   | 7962 G>A   |           | 0.17 | 0.76         | 0.18 | 0.27         | 0.15 | 0.42        |
|                |              | 1532268  | EX5    | 8963 C>T   | Ser175Leu | 0.37 | 0.28         | 0.34 | 0.94         | 0.40 | 0.12        |
|                |              | 7703033  | IVS5   | 10734 G>A  |           | 0.31 | 0.20         | 0.30 | 0.39         | 0.31 | 0.34        |
|                |              | 162031   | IVS5   | 11071 C>T  |           | 0.20 | 0.34         | 0.22 | 0.77         | 0.18 | 0.21        |
|                |              | 162033   | IVS5   | 11619 G>A  |           | 0.41 | 0.20         | 0.41 | <b>0.02</b>  | 0.40 | 0.65        |
|                |              | 162036   | EX7    | 16743 T>C  | Arg350Lys | 0.12 | 0.12         | 0.14 | 0.23         | 0.10 | 0.26        |
|                |              | 3815743  | IVS8   | 17893 T>C  |           | 0.16 | 0.60         | 0.15 | 0.87         | 0.18 | 0.54        |
|                |              | 3776455  | IVS12  | 27295 T>C  |           | 0.35 | 0.17         | 0.38 | 0.29         | 0.31 | 0.23        |
|                |              | 10380    | EX14   | 27975 G>A  | His595Tyr | 0.11 | 0.12         | 0.12 | 0.49         | 0.09 | 0.09        |
|                |              | 9282787  | 3' UTR | 31382 A>G  |           | 0.21 | 0.78         | 0.19 | 0.54         | 0.22 | 0.81        |
|                |              | 9332     | 3' UTR | 31496 G>A  |           | 0.12 | 0.11         | 0.14 | 0.24         | 0.11 | 0.23        |
|                |              | 8659     | 3' UTR | 31617 T>A  |           | 0.35 | 0.14         | 0.39 | 0.35         | 0.31 | 0.14        |
|                |              | 10520873 | 3' UTR | 32014 A>G  |           | 0.28 | 0.38         | 0.27 | 0.36         | 0.29 | 0.74        |
| <i>SHMT1</i>   | 17p11.2      | 2273026  | IVS3   | 9878 G>A   |           | 0.09 | 0.68         | 0.10 | 0.59         | 0.08 | 0.21        |
|                |              | 2273027  | IVS5   | 16330 C>T  |           | 0.35 | 0.91         | 0.35 | 0.90         | 0    | 0           |
|                |              | 9909104  | IVS5   | 18836 A>G  |           | 0.25 | 0.46         | 0.25 | 0.64         | 0.24 | 0.56        |
|                |              | 2168781  | IVS7   | 26111 C>G  |           | 0.41 | 0.36         | 0    | 0            | 0.41 | 0.36        |
|                |              | 1979277  | EX12   | 34761 C>T  | Leu435Phe | 0.31 | 0.80         | 0.29 | 0.68         | 0.33 | 0.91        |
|                |              | 12952556 | 3' UTR | 35060 T>C  |           | 0.31 | 0.61         | 0.29 | 0.68         | 0.33 | 0.82        |
|                |              | 921986   | 3' UTR | 39776 G>A  |           | 0.32 | 0.72         | 0.30 | 0.93         | 0.34 | 0.76        |
| <i>SLC19A1</i> | 21q22.3      | 3788205  | 5' UTR | -1992 C>T  |           | 0.32 | 0.91         | 0.30 | 0.32         | 0.34 | 0.32        |
|                |              | 1051298  | EX8    | 27560 C>T  |           | 0.43 | 0.83         | 0.43 | 0.83         | 0    | 0           |
|                |              | 17004785 | 3'UTR  | 29768 G>C  |           | 0.11 | 0.79         | 0.12 | 0.71         | 0.11 | 1.0         |
|                |              | 2838951  | 3'UTR  | 32666 G>C  |           | 0.44 | 0.68         | 0.44 | 0.58         | 0.44 | 0.96        |
| <i>TYMS</i>    | 18p11.32     | 11664283 | 5' UTR | -6650 G>A  |           | 0.29 | <b>0.04</b>  | 0.29 | 0.12         | 0.29 | 0.16        |
|                |              | 1001761  | IVS2   | 4485 C>T   |           | 0.48 | 0.65         | 0.48 | 0.68         | 0.48 | 0.30        |
|                |              | 699517   | 3' UTR | 15398 C>T  |           | 0.32 | 0.98         | 0.32 | 0.31         | 0.33 | 0.35        |
|                |              | 2790     | 3' UTR | 15468 T>C  |           | 0.22 | 0.49         | 0.22 | 0.52         | 0.23 | 0.74        |

|         |        |           |           |      |      |      |      |      |      |
|---------|--------|-----------|-----------|------|------|------|------|------|------|
| 3744962 | 3' UTR | 16702 A>G | Pro439Pro | 0.09 | 0.37 | 0.10 | 0.16 | 0.09 | 0.81 |
| 9948583 | 3' UTR | 17382 C>T |           | 0.33 | 0.64 | 0.33 | 0.52 | 0.34 | 0.21 |
| 2276115 | 3' UTR | 18156 A>T |           | 0.33 | 0.95 | 0.33 | 0.40 | 0.33 | 0.36 |
| 495139  | 3' UTR | 18390 G>C |           | 0.39 | 0.87 | 0.39 | 0.98 | 0.39 | 0.84 |
| 2612101 | 3' UTR | 18855 C>T |           | 0.19 | 0.39 | 0.17 | 0.37 | 0.20 | 0.76 |
| 2298582 | 3' UTR | 20003 A>C |           | 0.11 | 0.32 | 0.11 | 0.63 | 0.10 | 0.36 |
| 2298581 | 3' UTR | 20313 C>G |           | 0.22 | 0.47 | 0.22 | 0.35 | 0.23 | 0.92 |

*AHCYL1*, S-adenosylhomocysteine hydrolase-like 1; *ALDH1L1*, Aldehyde dehydrogenase 1 family, member L1 (formyltetrahydrofolate dehydrogenase); *DHFR*, Dihydrofolate reductase; *DNMT1*, DNA (cytosine-5-)-methyltransferase 1; *DNMT3A*, DNA (cytosine-5-)-methyltransferase 3 alpha; *DNMT3B*, DNA (cytosine-5-)-methyltransferase 3 beta; *DPYD*, Dihydropyrimidine dehydrogenase; *FOLR1*, Folate receptor 1; *MAT2B*, Methionine adenosyltransferase II, beta; *MBD4*, Methyl-cpg binding domain protein 4; *MGMT*, O-6-methylguanine-DNA methyltransferase; *MTHFD1*, Methylenetetrahydrofolate dehydrogenase (NADP+ dependent) 1; *MTHFD1L*, Methylenetetrahydrofolate dehydrogenase (NADP+ dependent) 1-like; *MTHFD2*, Methylenetetrahydrofolate dehydrogenase (NADP+ dependent) 2; *MTHFR*, 5,10-methylenetetrahydrofolate reductase (NADPH); *MTHFS*, 5,10-methenyltetrahydrofolate synthetase (5-formyltetrahydrofolate cyclo-ligase); *MTR*, 5-methyltetrahydrofolate-homocysteine methyltransferase; *MTRR*, 5-methyltetrahydrofolate-homocysteine methyltransferase reductase; *SHMT1*, Serine hydroxymethyltransferase 1 (soluble); *SLC19A1*, Solute carrier family 19 (folate transporter), member 1; *TYMS*, Thymidylate synthetase.

\* Nucleotide position of SNP in DNA sequence is relative to nucleotide gene start position (Ensembl, release 47).

† IVS, intervening sequence (intron); EX, exon; UTR, untranslated region; MAF, minor allele frequency.

‡ HWE, *P* value testing for Hardy-Weinberg equilibrium
